# Supplementary material
Source: PubMed Central journal article supplement (PMC6814386)

## SUPPLEMENTAL MATERIAL

**Figure A1:** Prediction performance as a function of data density. All features are used in all models. Experiments are limited to a 2 year observation window and 1 year prediction window. All data domains were used. Values are recorded as AUC of prediction.

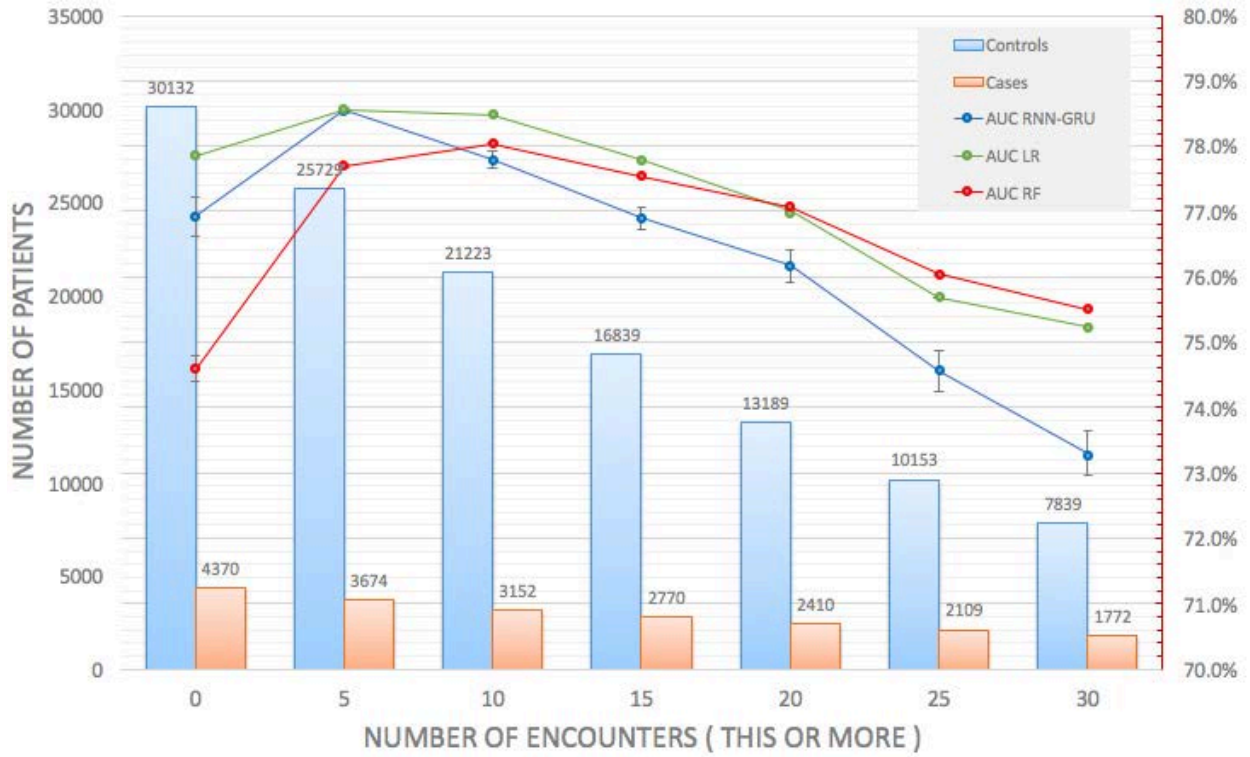

**Figure A2:** Prediction performance as a function of training set size. All features are used in all models. Values are recorded as AUC of prediction.

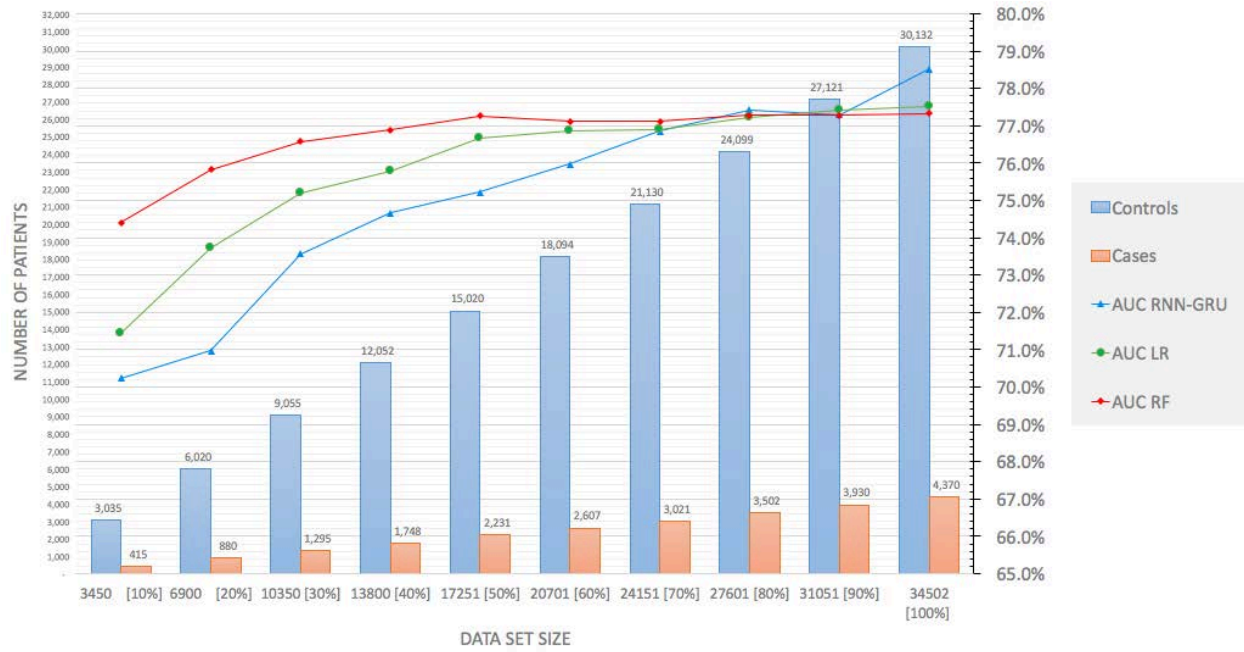

Supplement: NIHMS1539396-supplement-Supplemental_Material.pdf [file NIHMS1539396-supplement-Supplemental_Material.pdf]
